# Supplementary figures and images for: Synthesis, X-ray structures and NIR chiroptical properties of a series of dinuclear lanthanide(iii) complexes [Ln2{μ-(S- or RS-pba)}4(HBpz3)2]; novel configurational chirality due to non-bonding Ln⋯O interactions
Source: Royal Society of Chemistry journal article supplement (doi:10.1039/b304928k), 2003-01-01

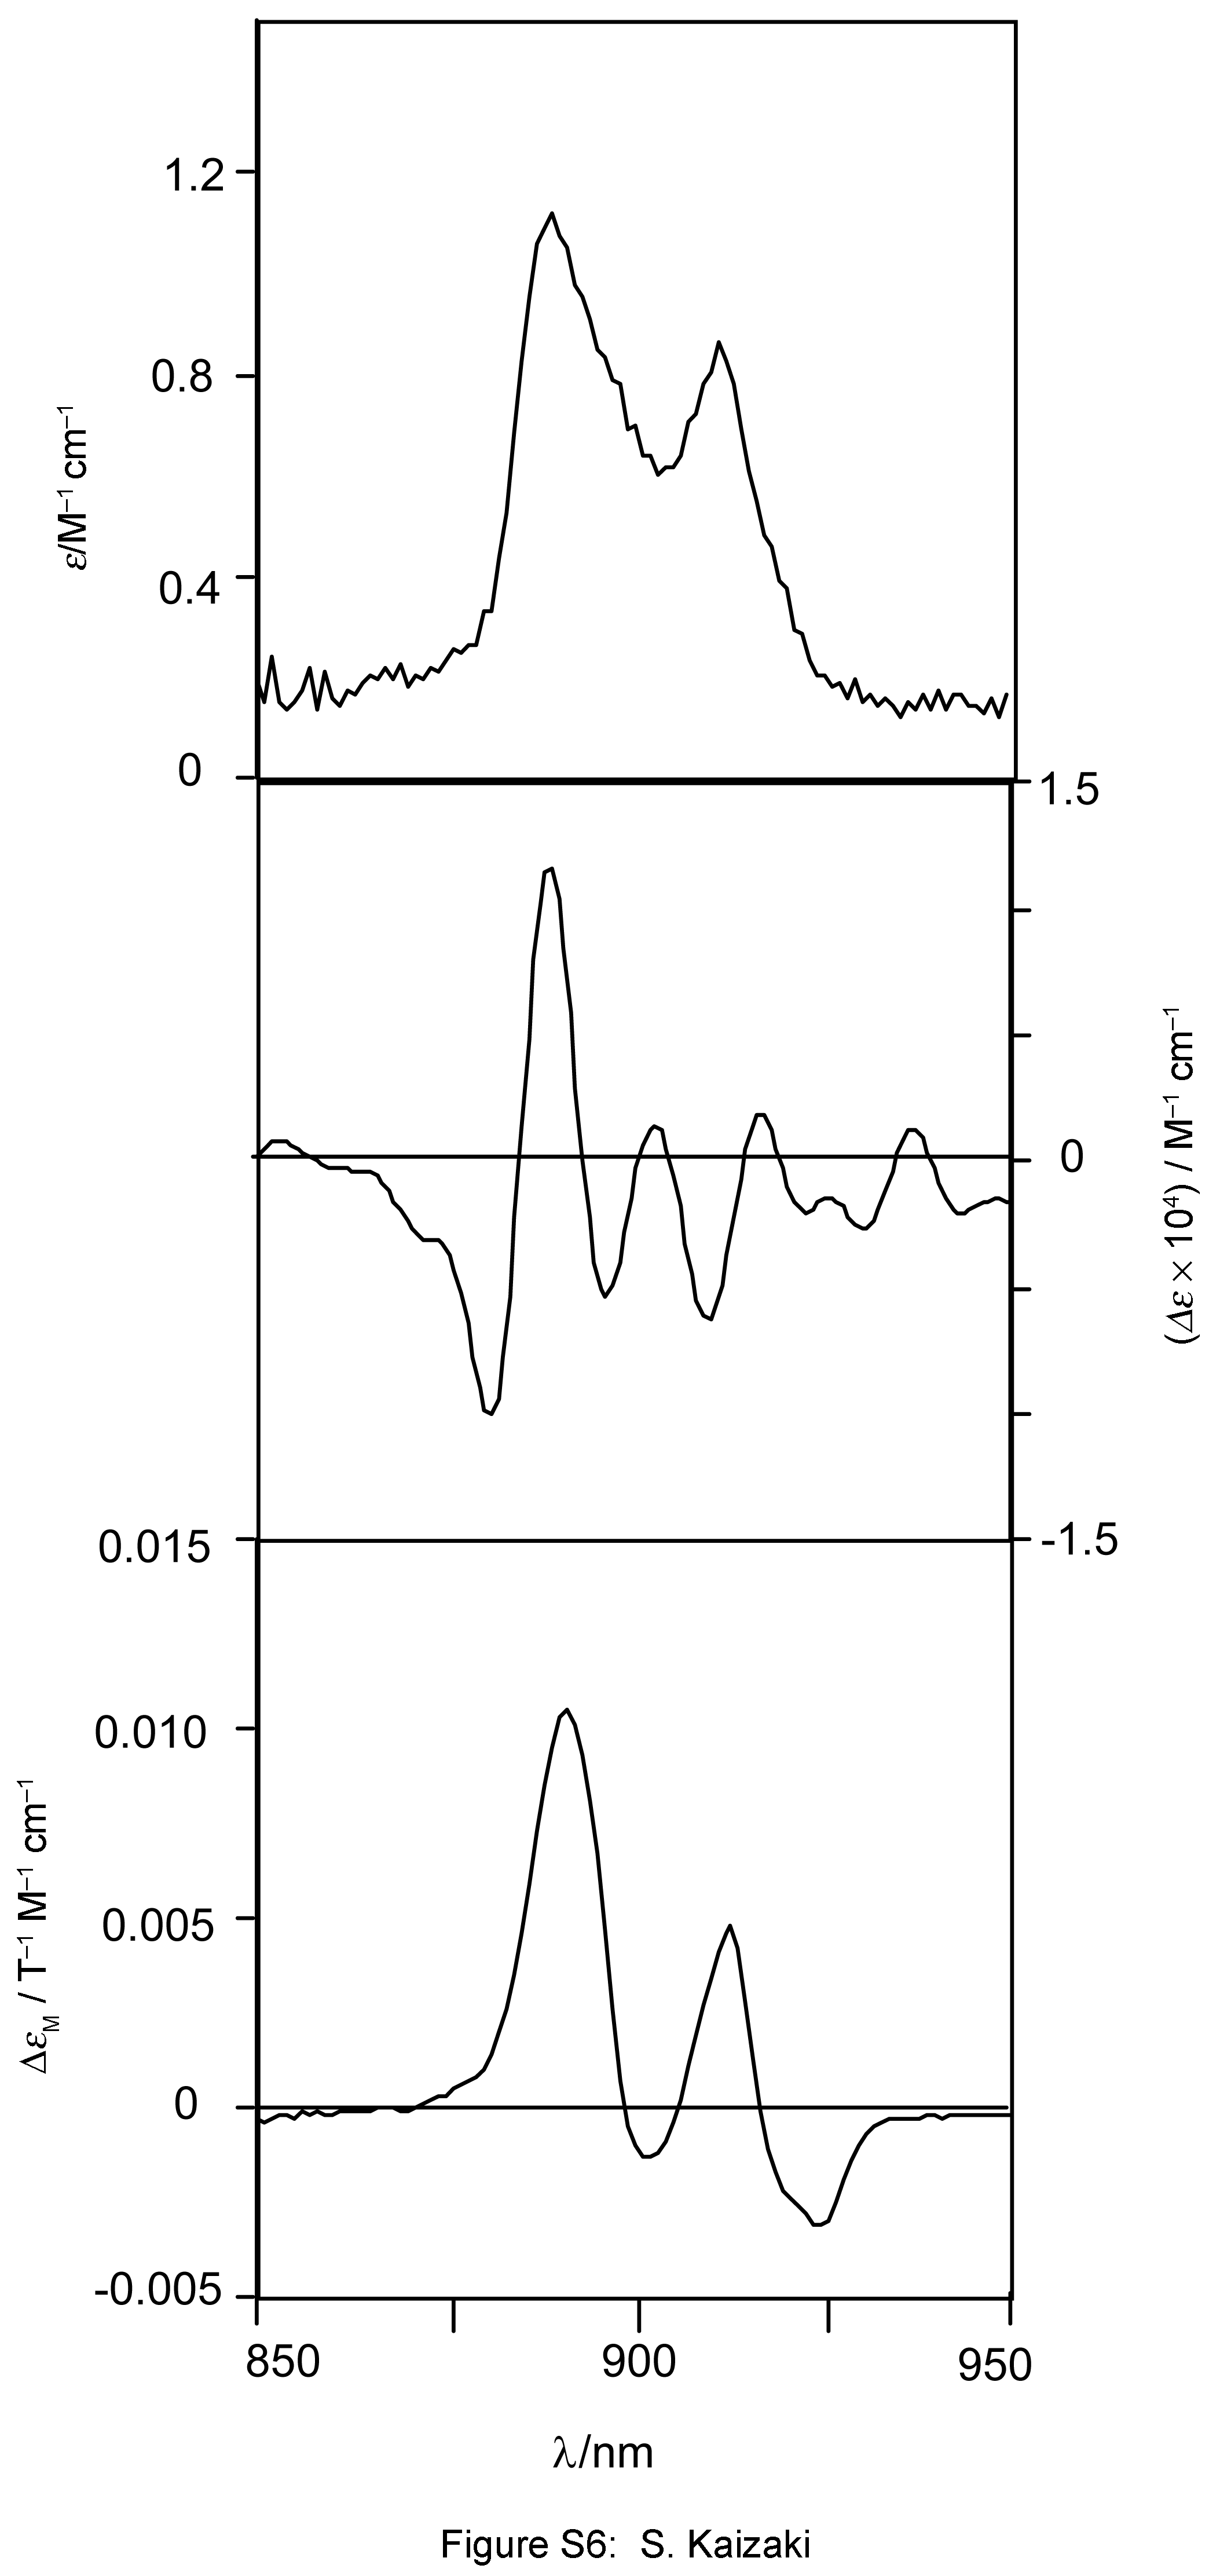


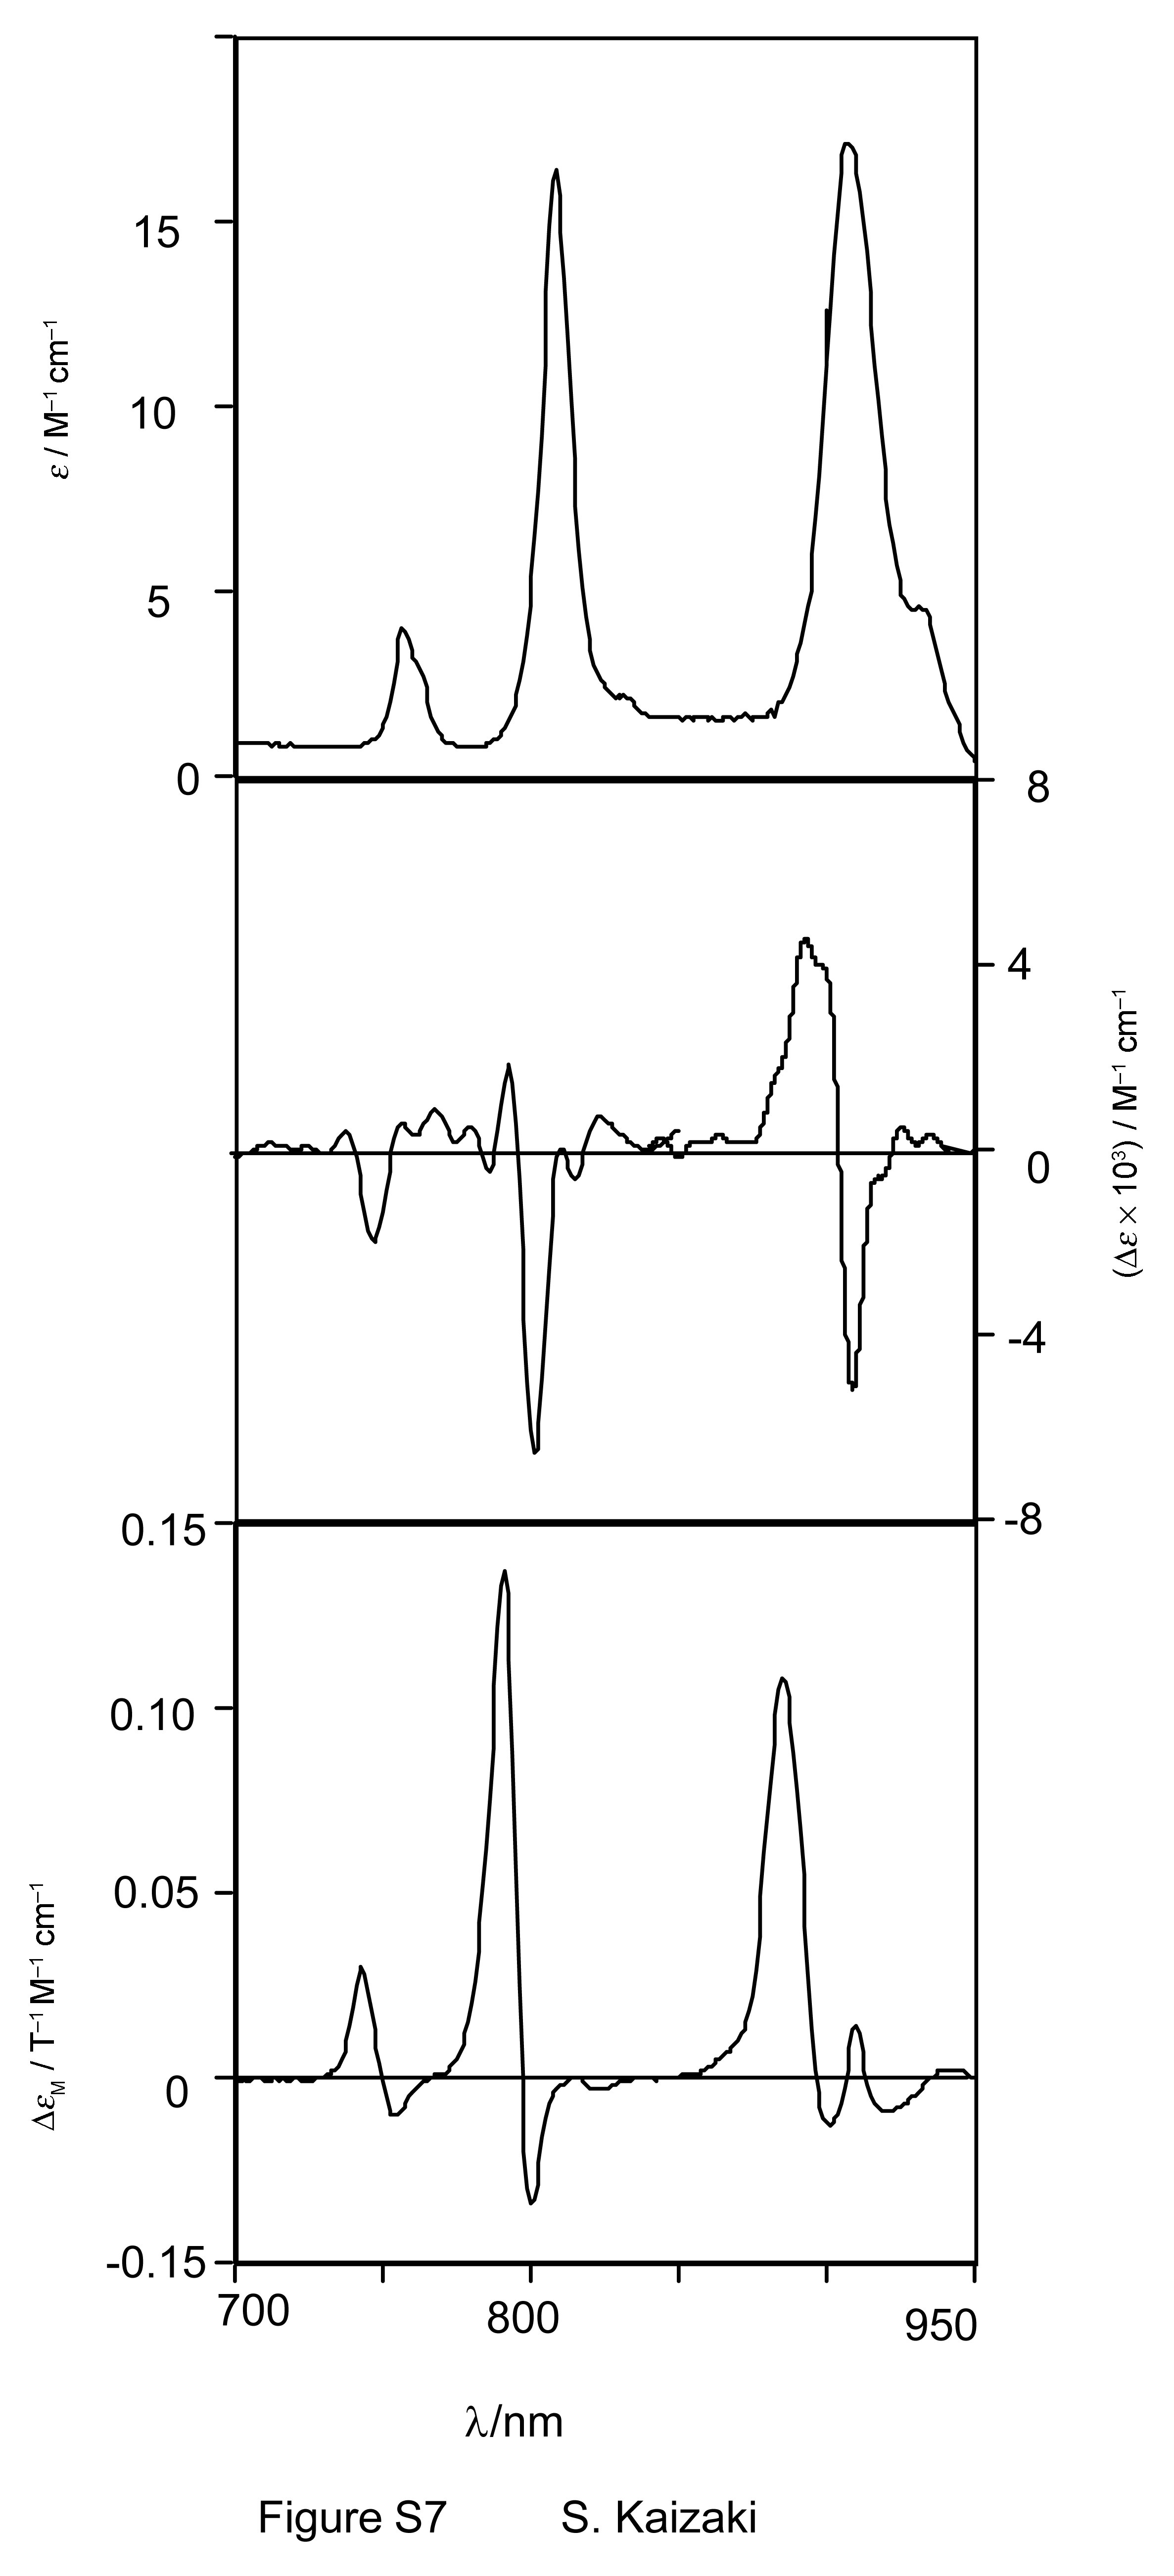

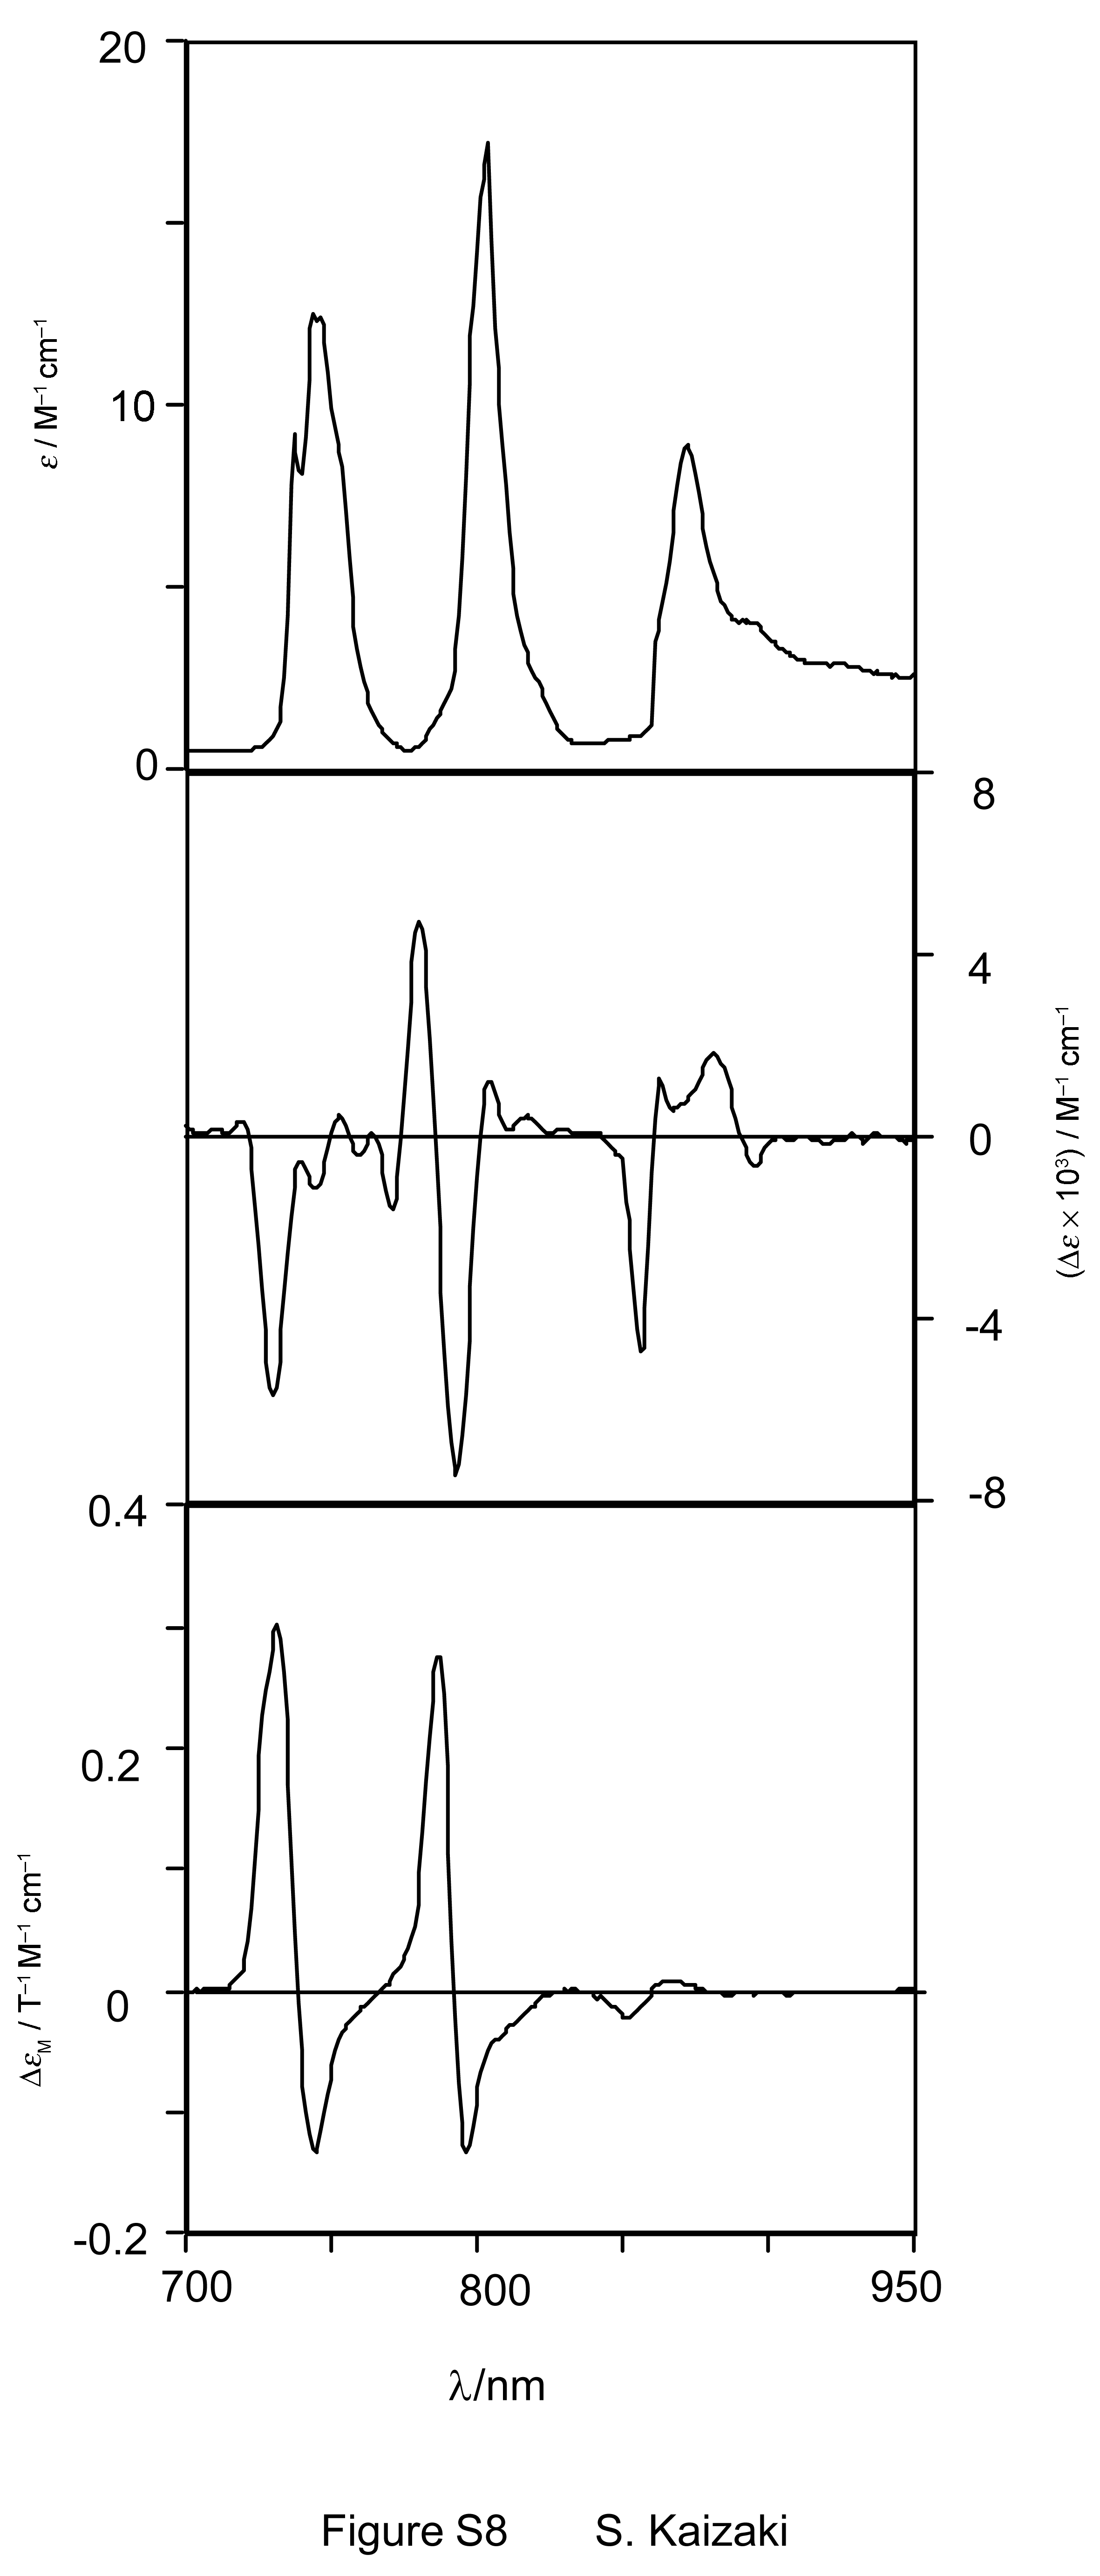

Supplement: b304928k.doc [file b304928k.doc]
